# Supplementary material
Source: PubMed Central journal article supplement (PMC4424032)
Supplement: supp_pp.15.00278_00278suppdata.pdf [file supp_pp.15.00278_00278suppdata.pdf]

## SUPPLEMENTAL INFORMATION

CSEP0105 ATGCACTCCAATCGCTTGCTCAGCTGTCTCGGAATTTGGTTGATATCTATCATAGGTCTG  
M H S N R L L S C L G I W L I S I I G L

CSEP0105 GTGCAGTGCATTACAGAATATTACTGTGGCAACAATGTGGTGATATCACAGGAACTAATT  
V Q C I T E Y Y C G N N V V I S Q E L I

CSEP0105 CAATCTGTCTAGCGAAATAGCTATCTCGGAATTAAGGGCTGGAGTTACATGGCACACATCC  
Q S V S E I A I S E L R A G V T W H T S

CSEP0105 TTATCCGGTATCATATATAGAGGAAATCTATGTGGTTTACCAAACCCGACCTATCGTTGG  
L S G I I Y R G N L C G L P N P T Y R W

CSEP0105 TTCATAACAACAGTCGGAAGATGAGAATTCGGAGGTGGTGATGAAATACTTTTTACTGGTC  
F I Q Q S E D E N S E V V M K Y F L L V

CSEP0105 TCGGCCAGTTGCGAAGTGCAGGGGGTCATAAGCACAGGCTGGAGGAAGAACTTGGAGAA  
S A S C E V Q G V I S T G W R K K L G E

CSEP0105 GATGACACCTGGTGTACCGAGGCATAA  
D D T W C T E A \*

CSEP0162 ATGCGCTTTTTCTCGTATGGCCATCATCTTTCATAGCGCAAGCTTCTGTACAACAAGCCTT  
M R F S R M A I I F H S A S F C T T S L

CSEP0162 GGCGCCCAATATTCTAGACATATTAATGAAGAATTGAAGGTATTTTCATTGTAATAATGAT  
A A Q Y S R H I N E E L K V F H C N N D

CSEP0162 ATCCATCAAGAGGAATATTCACGGACACCACATTATAAAATACAAGATCCAGATACCATT  
I H Q E E Y S R T P H Y K I Q D P D T I

CSEP0162 CAGGGATTGAACGAGGAGCTCAGTTATTTAGTTGCAGACACTTATGATACGAGGACTGTT  
Q G L N E E L S Y L V A D T Y D T R T V

CSEP0162 CAGTICTATGACCAAGACAACGGTGACTACGAGTATTTCAATCTTTCAGAAATATGTGAT  
Q F Y D Q D N G D Y E Y F N L S E I C D

CSEP0162 AGATATCAAGAGCAAGATGGTACTGTTGTTATTGAACACATACTCGTCAACGACCGGCAA  
R Y Q E Q D G T V V I E H I L V N D R Q

CSEP0162 GGTCGTGCATGTGCCATGATGATGATTAAGACTGTAATACCATTACCAATTGGGACGGA  
G R A C A M M M I K T V I P F T N W D G

CSEP0162 CAAAGTCCACAAAGATATTATAGCTTGTGCGCAGTTGGCTCGGGATAA  
Q S P Q R Y Y S L C A V G S G \*

**Figure S1.** Nucleotide and amino acid sequences of CSEP0105 and CSEP0162. Shaded sequences encode for predicted signal peptide. Sequences used for the RNAi constructs are shown underlined.

|          |                        |                                                 |
|----------|------------------------|-------------------------------------------------|
| <b>A</b> | HvHsp16.9-CI(AK362925) | ATGTCGATCGTGAGGCGTAGCAACGTGTTTCGACCCCTTCGCCGAC  |
|          | HvHsp16.9-CI-H         | .....                                           |
|          | HvHsp16.9-CI(AK362925) | GCGGACCCCTTCGACACCTTCCGCTCCATCGTCCC GGCGATCTCAC |
|          | HvHsp16.9-CI-H         | .....A.....                                     |
|          | HvHsp16.9-CI(AK362925) | AACAGCGAGACAGCTGCGTTTCGCGAACGCCCGGATGGACTGGAAGC |
|          | HvHsp16.9-CI-H         | .....C.....                                     |
|          | HvHsp16.9-CI(AK362925) | CCCGAGGCGCACGTCTTCAAGGCTGATCTTCTGGCGTGAAGAAGC   |
|          | HvHsp16.9-CI-H         | .....                                           |
|          | HvHsp16.9-CI(AK362925) | GTCAAGGTGGAGGTGGAGGACGGCAACGTGCTCGTCGTCAGCGGCC  |
|          | HvHsp16.9-CI-H         | .....                                           |
| <b>B</b> | HvHsp16.9-CI(AK362925) | MSIVRRSNVDFPFADLWADPFDTFRSIVPAISGGNSETAAFANARM  |
|          | HvHsp16.9-CI-H         | .....                                           |
|          | HvHsp16.9-CI(AK362925) | PEAHVFKADLPGVKKEEVKVEVEDGNVLVVS GERTKEKEDKNDKWF |
|          | HvHsp16.9-CI-H         | .....                                           |
|          | HvHsp16.9-CI(AK362925) | SGKFVRRFRLPEDAKVEEVKAGLENGVLT VTPKAEVKKPEVKAIE  |
|          | HvHsp16.9-CI-H         | .....T.....                                     |

**Figure S2.** (A) Nucleotide and (B) amino acid alignments of *HvHsp16.9-CI* and *HvHsp16.9-CI-H*. There are 14 nucleotide differences, where 12 are synonymous and two are non-synonymous. Dots indicate identical nucleotides and amino acids.

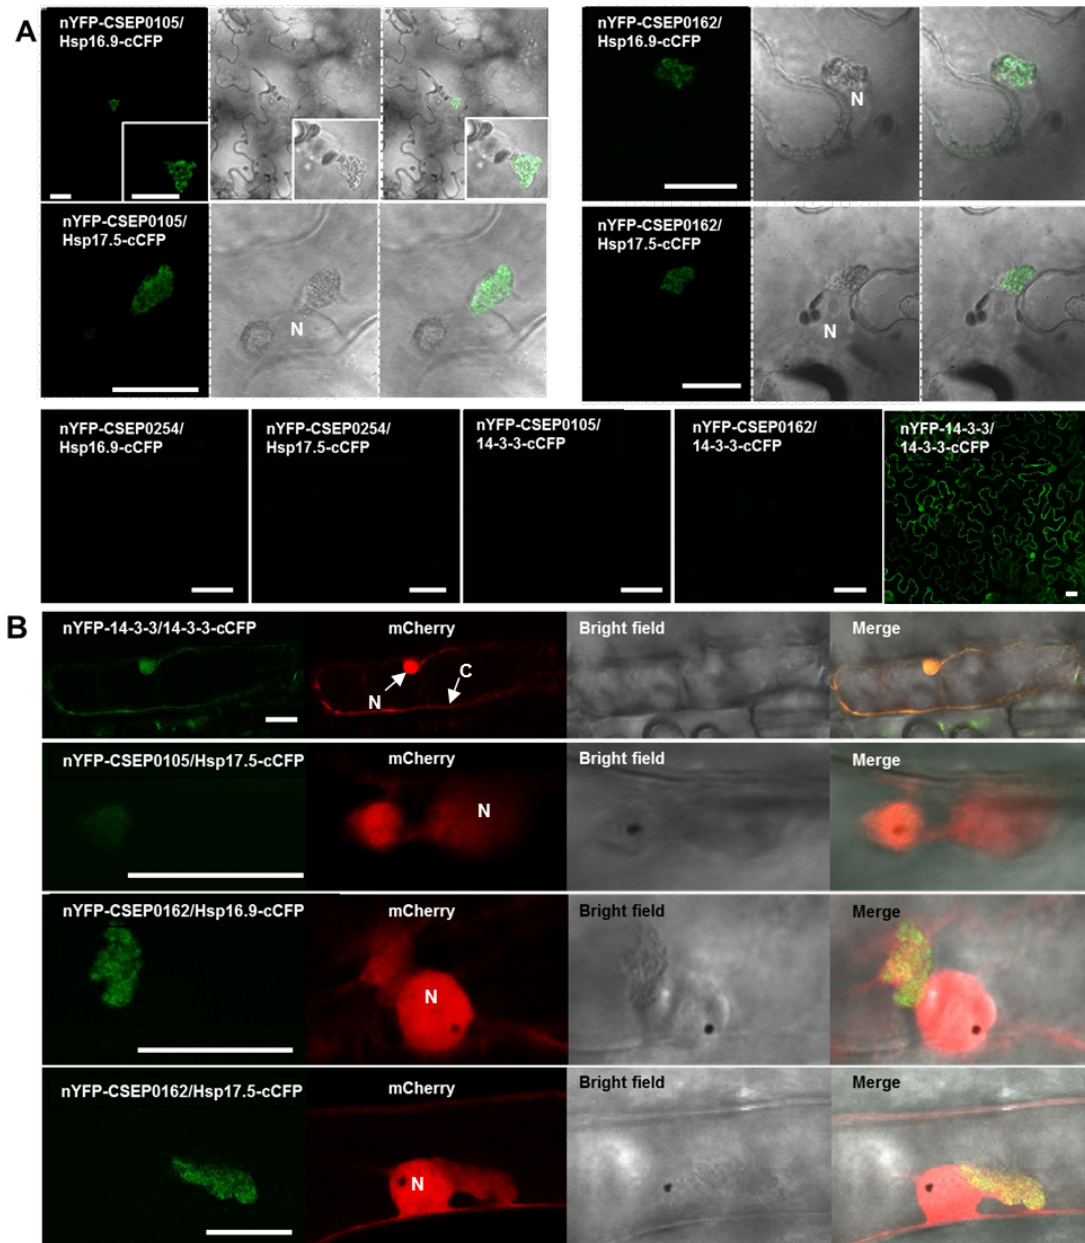

**Figure S3.** CSEP0105 and CSEP0162 interact with the barley Hsp16.9 and Hsp17.5 proteins in *Nicotiana benthamiana* and barley in a BiFC assay. The CSEPs were fused N-terminally by nYFP and the Hsps were fused C-terminally by cCFP. A) Constructs were co-expressed into *N. benthamiana* leaves using *Agrobacterium* mediated transformation. Interaction of two 14-3-3 proteins was used as a positive control. CSEP0254 and 14-3-3 proteins were used as negative controls. B) The nYFP-CSEP and Hsp-cCFP fusion constructs were co-transformed with the mCherry transformation marker, which localizes to the cytosol and the nucleus, using particle bombardment into barley leaf epidermal cells. C, cytosol. N, nucleus. Scale bar, 20 μm.

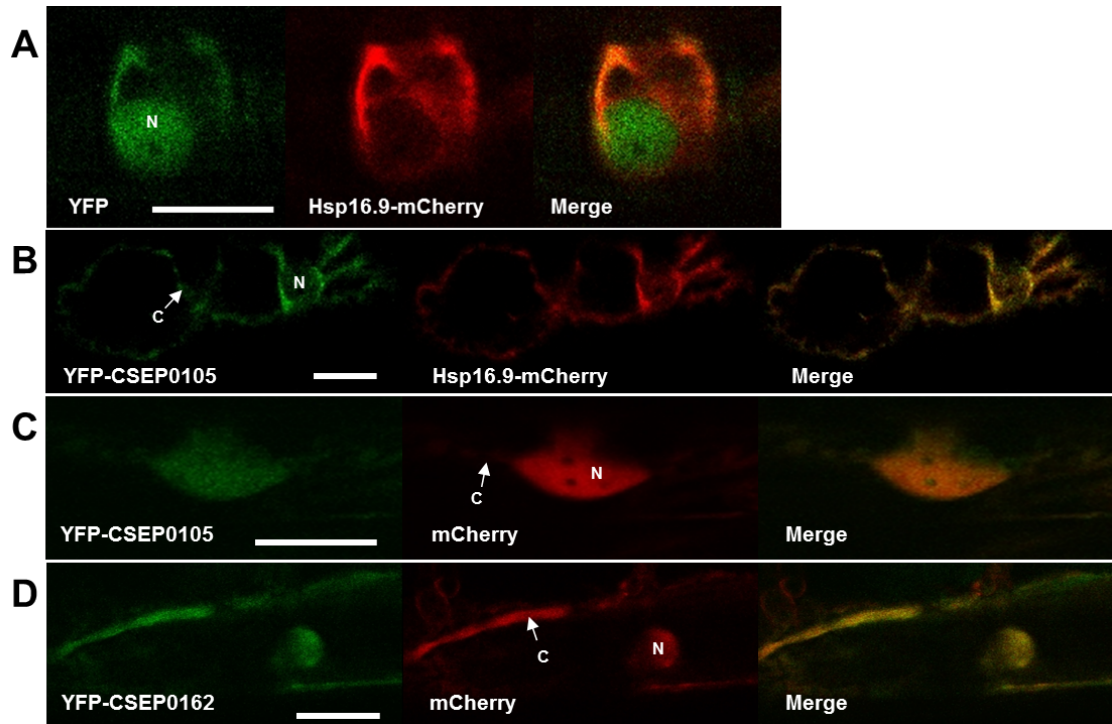

**Figure S4.** Localization of CSEP0105, CSEP0162, and Hsp16.9 proteins in *Bgh*-infected barley cells. (A-D) Confocal images showing the nuclei of the same cells presented in Fig. 9. C, cytosol. N, nucleus. Scale bar, 20 μm.

**Table S1. List of small heat shock proteins identified in barley**

| Name <sup>1)</sup>    | MW (kD) | bp   | AA  | cDNA resources           |                          | Gene expression resources <sup>4)</sup> | Genome resources <sup>5)</sup> |                 | Localization <sup>6)</sup> |
|-----------------------|---------|------|-----|--------------------------|--------------------------|-----------------------------------------|--------------------------------|-----------------|----------------------------|
|                       |         |      |     | HarvEST ID <sup>2)</sup> | FI cDNA ID <sup>3)</sup> |                                         | Probe Set ID                   | Morex contig    |                            |
| MLOC_62670.1          | 15.09   | 417  | 138 |                          |                          | none                                    | 46836                          | 7H cM=66        |                            |
| <i>HvHsp15.1-Px</i>   | 15.14   | 417  | 138 |                          | AK365443                 | none                                    | none identical                 |                 | peroxisome                 |
| <i>HvHsp16.7-CI</i>   | 16.76   | 453  | 150 | 35_14864                 | AK252765                 | Contig2010_at                           | 120794                         | 4H cM=55        | cytoplasm                  |
| MLOC_45029.1          | 16.79   | 459  | 152 |                          |                          | none                                    | 276057                         | 2H cM=138       |                            |
| MLOC_44536.1          | 16.84   | 453  | 150 |                          |                          | Contig2007_s_at                         | 274906                         | 3H cM=15        | cytoplasm                  |
| <i>HvHsp16.86-CI</i>  | 16.86   | 456  | 151 |                          | AK376179                 | EBro08_SQ011_I03_at                     | 54783 (8 SNPs)                 | 3H cM=15        | cytoplasm                  |
| <i>HvHsp16.88-CI</i>  | 16.88   | 453  | 150 | 35_14863                 | AK355146                 | Contig2008_s_at                         | none identical                 | 3 <sup>4)</sup> | cytoplasm                  |
| <i>HvHsp16.9-CI</i>   | 16.93   | 456  | 151 | 35_14860                 | AK362925                 | Contig2004_s_at                         | 66925                          | 3HS             | cytoplasm                  |
| <i>HvHsp16.9-CI-H</i> | 16.93   | 456  | 151 |                          |                          | none                                    | none identical                 |                 | cytoplasm                  |
| <i>HvHsp17.1-CV</i>   | 17.14   | 468  | 155 | 35_5795                  | AK241741                 | Contig13073_at                          | 49195                          | 2H cM=58        | cytoplasm                  |
| <i>HvHsp17.3-CII</i>  | 17.34   | 480  | 159 | 35_15451                 | AK375970                 | Contig3284_x_at                         | 135539                         | 3H cM=46        | cytoplasm                  |
| MLOC_32229.1          | 17.41   | 480  | 159 |                          |                          | Contig3286_s_at                         | 226559                         | 3H cM=45        | cytoplasm                  |
| MLOC_6787.1           | 17.54   | 477  | 158 |                          |                          | Contig2006_at                           | 138095                         | 4H cM=56        |                            |
| <i>HvHsp17.5-CI</i>   | 17.57   | 477  | 158 | 35_14859                 | AK250749                 | HB18H23r_s_at                           | 64954                          | 4H cM=51        | cytoplasm                  |
| <i>HvHsp17.7-CII</i>  | 17.61   | 489  | 162 | 35_15454                 | BF263847                 | Contig3287_x_at                         | none identical                 | 3 <sup>4)</sup> | cytoplasm                  |
| AK373460              | 17.63   | 498  | 165 |                          |                          | none                                    | 70124                          | 3H cM=14        |                            |
| <i>HvHsp17.76-CIX</i> | 17.65   | 498  | 165 | 35_5001                  | AK370196                 | Contig11961_at                          | 46949                          | 3HS             | cytoplasm                  |
| AK375791              | 17.67   | 489  | 162 |                          |                          | Contig3285_at                           | 81807                          | 3H cM=46        | cytoplasm                  |
| <i>HvHsp-17.77CII</i> | 17.78   | 489  | 162 | 35_15456                 | AK355146                 | Contig3289_at                           | 69124                          | 3H cM=46        | cytoplasm                  |
| <i>HvHsp17.7-CI</i>   | 17.80   | 486  | 161 | 35_14866                 | AK368988                 | Contig2012_s_at                         | 51731                          | 4H cM=51        | cytoplasm                  |
| <i>HvHsp19.0-CIII</i> | 19.05   | 537  | 178 | 35_18565                 | AK360636                 | Contig10029_at                          | 52273                          | 6H cM=91        | cytoplasm                  |
| <i>HvHsp19.2-CX</i>   | 19.26   | 534  | 177 | 35_5077                  | AK370937                 | Contig15445_at                          | 368996                         | 6H cM=49        | cytoplasm                  |
| MLOC_52605.1          | 20.64   | 561  | 186 |                          |                          | none                                    | 37653                          | 1H cM=66        |                            |
| <i>HvHsp21.2</i>      | 21.25   | 585  | 194 | 35_23844                 | BF623486                 | Contig21040_at                          | 77164                          | 4H cM=73        |                            |
| <i>HvHsp21.3-MI</i>   | 21.36   | 582  | 193 | 35_16753                 | AK370932                 | Contig6559_at                           | none identical                 | 7 <sup>4)</sup> | mitochondria               |
| <i>HvHsp21.9-ER</i>   | 21.98   | 618  | 205 |                          | AK374148                 | none                                    | 51617                          | 4H cM=51        | endoplasmic reticulum      |
| AK372933              | 22.58   | 621  | 206 |                          |                          | Contig6557                              | none identical                 |                 | chloroplast                |
| MLOC_75175.1          | 23.42   | 651  | 216 |                          |                          | none                                    | 67285                          | 6H cM=75        |                            |
| MLOC_10834.2          | 23.49   | 651  | 216 |                          |                          | none                                    | 1559883                        | 2H cM=58        |                            |
| MLOC_6726.1           | 24.17   | 666  | 221 |                          |                          | none                                    | 138014                         | 4HL             |                            |
| MLOC_47822.1          | 25.16   | 711  | 236 |                          |                          | none                                    | 312759                         | 5H cM=51        | chloroplast                |
| MLOC_50285.1          | 25.32   | 681  | 226 |                          |                          | none                                    | 358032                         | 1H              |                            |
| MLOC_7795.1           | 26.44   | 750  | 249 |                          |                          | none                                    | 140185                         | 5H cM=50        | chloroplast                |
| <i>HvHsp26.8-P</i>    | 26.80   | 735  | 244 | 35_21394                 | AK376976                 | EBem05_SQ003_L06_at                     | 78169                          | 4H cM=57        | chloroplast                |
| MLOC_16644.1          | 28.33   | 780  | 259 |                          |                          | none                                    | 1574043                        | 3H cM=52        |                            |
| MLOC_67109.1          | 29.11   | 807  | 268 |                          |                          | none                                    | 52587                          | 1H              |                            |
| AK363601              | 36.17   | 1029 | 342 |                          |                          | none                                    | none identical                 |                 |                            |
| MLOC_66935.1          | 38.96   | 1104 | 367 |                          |                          | none                                    | 52302                          | 1H cM=132       |                            |

Foot notes: **1)** The naming follows Reddy et al. (2014) for those starting with *HvHsp*, the MLOC-names are from the barley genome annotation and there are four sequences solely based on cDNA-clones and their genbank-accession numbers are given. **2)** HarvEST ID according to the HarvEST-database: <http://harvest.ucr.edu/>. **3)** Full length cDNA accession numbers in NCBI: <http://www.ncbi.nlm.nih.gov/>. **4)** PLEXdb (<http://www.plexdb.org/index.php>). The Affymetrix probe set Ids indicated for those present on the array. Chromosomal location based on transcript profiling of wheat-barley ditelosomic chromosome addition lines. **5)** The contig IDs and chromosomal localization from the genome resource at IPK Gatersleben (<http://webblast.ipk-gatersleben.de/barley/index.php>). **6)** Predicted by Reddy et al. 2014 and us using the same softwares. The two identified sHsps are shaded with dark grey

**Table S2.** Primer sequences for plasmid constructions and gene expression assay (5' to 3')

| Primers for RNAi                                                                  |                               |
|-----------------------------------------------------------------------------------|-------------------------------|
| CSEP0105_RNAi_F                                                                   | ATCTATCATAGGTCTGGTGCAGTG      |
| CSEP0105_RNAi_R                                                                   | GGTGTCATCTTCTCCAAGTTTCTT      |
| CSEP0162_RNAi_F                                                                   | GTATGGCCATCATCTTTCATAGC       |
| CSEP0162_RNAi_R                                                                   | CAACAGTACCATCTTGCTCTTGAT      |
| Hsp16.9_RNAi_F                                                                    | CACCACTCAACCGAGTGCCAAGC       |
| Hsp16.9_RNAi_R                                                                    | TGACCTCCTCCTTCTTCACG          |
| Primers for the bait constructs in Y2H, BiFC, localization and protein expression |                               |
| CSEP0081_F                                                                        | GGAAATGCAAAGTACAATTG          |
| CSEP0081_R_with stop                                                              | TTACATGGCAGTACATGGTAAATAG     |
| CSEP0105_F                                                                        | ATTACAGAATATTACTGTGGCAAC      |
| CSEP0105_R_with stop                                                              | TTATGCCTCGGTACACCA            |
| CSEP0105_R_no stop                                                                | AAATGCCTCGGTACACCAGGT         |
| CSEP0162_F                                                                        | GCCCAATATTCTAGACATATTAATGA    |
| CSEP0162_R_with stop                                                              | TTATCCCGAGCCAACACTGC          |
| CSEP0162_R_no stop                                                                | AAATCCCGAGCCAACACTGCGCA       |
| CSEP0254_F                                                                        | CACCAACCAACATTACAAATGTGATGA   |
| CSEP0254_R_with stop                                                              | CTAACTAATATCTTGCAGAGAACATAC   |
| CSEP0254_R_no stop                                                                | AAAATAATATCTTGCAGAGAACATACTAT |
| Hsp16.9_F                                                                         | CACCATGTTCGATCGTGAGGCGTA      |
| Hsp16.9_R_with stop                                                               | TCAGCCGGAGATCTCGAT            |
| Hsp16.9_R_no stop                                                                 | AAAGCCGGAGATCTCGATGGC         |
| Hsp17.5_F                                                                         | CACCATGTTCGCTGATCCGTCGC       |
| Hsp17.5_R_with stop                                                               | CTAGCCGGAGATCTGGATG           |
| Hsp17.5_R_no stop                                                                 | AAAGCCGGAGATCTGGATGGAC        |
| Primers for qPCR                                                                  |                               |
| CSEP0105_qPCR_F                                                                   | GAGAATTCGGAGGTGGTGAT          |
| CSEP0105_qPCR_R                                                                   | GTTTCTTCCTCCAGCCTGTG          |
| CSEP0162_qPCR_F                                                                   | GTGATAGATATCAAGAGCAAGATGG     |
| CSEP0162_qPCR_R                                                                   | TCTTAATCATCATCATGGCACA        |
| BghGAPDH_qPCR_F                                                                   | ATGAACTACAAGGCATCCTGTCA       |
| BghGAPDH_qPCR_R                                                                   | TACCATGCGACTAGCTTAACAAAG      |
